# Supplementary material for: The Genome Sequence of the Wild Tomato Solanum pimpinellifolium Provides Insights Into Salinity Tolerance
Source: Front Plant Sci. 2018 Oct 4;9:1402. doi: 10.3389/fpls.2018.01402 (PMC6186997; doi:10.3389/fpls.2018.01402)
Supplement: Supplementary file 2 [file Data_Sheet_2.xlsx]

## Sheet: Sheet1
S. lycopersicumlocus	Chromosome	CNV window - start	CNV window - end	CNV region - start	CNV region - end	Normalized fold difference	P-value	S. lycopersicumprotein ID	Protein length (aa)	Functional annotation
LOC104646013	1	14930999	14935862	14927323	14935878	2.04405	0	XP_010317301.1	1496	uncharacterized protein LOC104646013
LOC104646565	1	14955263	14960760	14955061	14970102	1.97795	0	XP_010318678.1	310	uncharacterized protein LOC104646565 isoform X1
LOC101268027	1	71745872	71749289	71745649	71749374	1.76571	0	XP_004229283.1	992	protein QUIRKY
LOC101262951	1	64242703	64243284	64242313	64243416	1.75727	9.22098e-94	XP_004229103.1	193	uncharacterized protein LOC101262951
LOC109119852	1	4733821	4734510	4733263	4734918	1.74556	4.32189e-145	NA	NA	NA
LOC104647157	1	60357843	60360868	60355267	60361752	1.66862	0	XP_010320224.1	943	uncharacterized protein LOC104647157
LOC109119452	1	11968823	11970076	11968189	11970672	1.66242	1.45011e-210	XP_019067541.1	417	glycine-rich cell wall structural protein-like
LOC101268217	1	10554632	10555949	10545133	10556310	1.63225	0	NA	NA	NA
LOC101254630	1	66460239	66461069	66460111	66461214	1.59896	7.82359e-84	XP_004229089.1	251	uncharacterized protein LOC101254630
LOC101264056	1	55578450	55579196	55577983	55580466	1.56818	5.99679e-196	XP_004229140.1	217	uncharacterized protein LOC101264056
LOC104646536	1	43127681	43128473	43127485	43128726	1.51179	4.64347e-89	XP_010318532.1	231	octapeptide-repeat protein T2-like
LOC104646266	1	4470908	4471327	4468441	4474374	1.44405	0	XP_019068578.1	140	uncharacterized protein LOC104646266, partial
LOC104645907	1	24314801	24316396	24308287	24317394	1.36793	0	XP_010316973.1	336	uncharacterized protein LOC104645907
LOC109119554	1	24310642	24312372	24308287	24317394	1.36793	0	XP_019067726.1	556	uncharacterized protein LOC109119554
LOC104646609	1	14674982	14676141	14674645	14676162	1.36328	1.08373e-96	NA	NA	NA
LOC101250939	1	97368465	97370223	97368247	97371834	1.34162	1.74194e-233	XP_004231441.1	102	auxin-induced protein 15A-like
LOC101265290	1	89396872	89398395	89396539	89398470	1.3341	1.90056e-121	XP_019068850.1	379	acetylajmalan esterase-like
LOC104645446	1	98456444	98457211	98456101	98457618	1.32103	1.32435e-92	XP_010315434.1	106	uncharacterized protein LOC104645446
LOC101249292	1	27279348	27280230	27275011	27281082	1.28432	0	XP_004228778.1	268	uncharacterized protein LOC101249292
LOC109119501	1	14817995	14820332	14815267	14821614	1.28298	0	XP_019067621.1	648	uncharacterized protein LOC109119501
LOC101244998	1	91265068	91266432	91265059	91266438	1.27046	4.1219e-79	XP_004230378.1	323	pentatricopeptide repeat-containing protein At4g38150-like
LOC104649092	1	85438430	85439272	85438147	85439388	1.25204	4.29701e-69	XP_010326029.1	280	transcription factor TCP9
LOC109119425	1	9627342	9628041	9627157	9628122	1.2493	4.08602e-52	NA	NA	NA
LOC109119875	1	36532488	36534909	36531775	36536466	1.23309	9.23031e-273	NA	NA	NA
LOC101264547	1	32646288	32647102	32642245	32647350	1.22853	9.19074e-296	XP_004228764.1	242	uncharacterized protein LOC101264547
LOC104645881	1	25974430	25976340	25973395	25978776	1.21781	0	XP_010316896.1	309	uncharacterized protein LOC104645881
LOC104645468	1	93802095	93803936	93801913	93803982	1.21777	8.29354e-115	XP_010315484.2	613	proline-rich extensin-like protein EPR1
LOC109119553	1	24121172	24122308	24120193	24122538	1.20277	1.37822e-128	XP_019067724.1	301	uncharacterized protein LOC109119553
LOC101260173	1	74424844	74425672	74424781	74425884	1.18138	7.38777e-56	XP_010321810.1	193	bifunctional epoxide hydrolase 2-like, partial
LOC109119522	1	15035320	15035969	15032479	15037308	1.17272	5.51954e-261	NA	NA	NA
LOC101256212	1	6865010	6866297	6863845	6866604	1.1623	7.81743e-145	NA	NA	NA
LOC104646156	1	8497861	8499670	8496523	8502456	1.15521	0	XP_010317658.1	291	uncharacterized protein LOC104646156
LOC101248606	1	16846256	16848182	16840141	16849248	1.15504	0	XP_010317189.1	393	uncharacterized protein LOC101248606
LOC109119433	1	10233419	10234209	10231735	10234218	1.14955	1.08638e-127	NA	NA	NA
LOC101262553	1	69046071	69046949	69044713	69047058	1.14071	6.41219e-119	XP_019068088.1	292	uncharacterized protein K02A2.6-like
LOC109120082	1	69045369	69045902	69044713	69047058	1.14071	6.41219e-119	XP_019069000.1	177	uncharacterized protein LOC109120082
LOC109119558	1	25458895	25460345	25457275	25461828	1.12813	6.86168e-232	XP_019067741.1	170	uncharacterized protein LOC109119558
LOC101251619	1	83548236	83550038	83548099	83550168	1.11343	1.37212e-100	XP_004229727.1	329	trihelix transcription factor ASIL2
LOC104646144	1	9558413	9559408	9558295	9559674	1.10686	9.15804e-65	NA	NA	NA
LOC101258689	1	35963136	35964830	35962387	35965836	1.09703	3.3165e-167	XP_004228958.1	410	uncharacterized protein K02A2.6-like
LOC101252717	1	81315471	81316060	81315259	81319122	1.08623	4.98821e-185	XP_004229355.1	136	histone H3.2
LOC109119611	1	69041187	69042759	69039607	69043608	1.08273	7.40045e-191	XP_019068085.1	485	uncharacterized protein LOC109119611
LOC101259298	1	97584472	97585223	97584355	97585320	1.06895	1.44225e-41	XP_004231016.1	171	glycine-rich protein 2-like
LOC104648289	1	79104788	79106812	79102015	79107258	1.06224	3.2259e-244	XP_010323525.1	596	uncharacterized protein LOC104648289
LOC101258189 (sbt4e)	1	82714875	82717207	82714717	82717476	1.0556	3.42008e-125	NP_001317298.1	777	serine protease precursor
LOC101255523	1	1927141	1927884	1927033	1928412	1.02424	1.38355e-57	XP_004228567.1	174	uncharacterized protein LOC101255523
LOC101245206	1	89536279	89537533	89536195	89537850	1.02132	1.14708e-69	XP_004230209.1	355	probable 3-hydroxyisobutyrate dehydrogenase-like 1, mitochondrial
LOC101256629 (CAB-10A)	1	93326951	93328081	93326365	93328158	1.01372	5.86934e-75	NP_001296324.1	256	chlorophyll a-b binding protein CP24 10A, chloroplastic
LOC104647787	1	73197648	73198417	73197547	73200858	1.00839	9.98905e-141	XP_010321865.1	203	uncharacterized protein LOC104647787
LOC109119476	2	33206205	33207018	33206113	33208734	1.74427	1.47892e-205	XP_019067568.1	166	ubiquitin domain-containing protein DSK2b-like
LOC104645614	2	28796352	28796966	28796047	28799496	1.54275	1.14994e-235	XP_010315775.1	204	RNA-binding motif protein, X chromosome-like
LOC101251732	2	24703086	24704711	24702415	24705036	1.52121	3.7673e-174	XP_004231658.1	513	uncharacterized protein LOC101251732
LOC101248530	2	24135478	24139336	24135097	24140478	1.50117	0	XP_010315745.1	1257	uncharacterized protein LOC101248530
LOC104646022	2	44908400	44909428	44908237	44909616	1.48235	3.20075e-85	XP_010317311.1	342	glycine-rich cell wall structural protein 1-like
LOC104645537	2	25988509	25990182	25988299	25990506	1.45136	6.21599e-137	XP_010315653.2	279	uncharacterized protein LOC104645537
LOC109119559	2	36437323	36438989	36436831	36441660	1.44504	5.57839e-306	XP_019067750.1	390	uncharacterized protein LOC109119559 isoform X1
LOC109119454	2	22336987	22337763	22336819	22343580	1.44361	0	XP_019067542.1	258	uncharacterized protein LOC109119454
LOC109119631 (TRNAA-UGC)	2	50421927	50421999	50421613	50422578	1.38957	7.69838e-53	NA	NA	NA
LOC104645658	2	3220551	3221096	3220231	3221196	1.36284	1.67355e-51	XP_010315834.1	181	octapeptide-repeat protein T2-like
LOC109119470	2	30661000	30661431	30658495	30663462	1.29719	6.46876e-272	XP_019067559.1	143	uncharacterized protein LOC109119470
LOC104645660	2	2799512	2800306	2797813	2800710	1.29203	2.07949e-155	XP_010315837.1	173	uncharacterized protein LOC104645660
LOC101247476	2	16129623	16130747	16129441	16130958	1.29154	1.22651e-78	XP_004231516.1	374	uncharacterized protein LOC101247476
LOC101250856	2	42073026	42074532	42072751	42074682	1.28907	2.1867e-101	XP_004232966.1	395	phospholipase A1-IIgamma-like
LOC101264286	2	40522139	40523100	40522045	40523148	1.27579	1.13732e-54	XP_010316910.1	265	chlorophyll a-b binding protein 1C, chloroplastic-like
LOC109119443	2	1527291	1529306	1522279	1532490	1.23185	0	XP_019067529.1	489	uncharacterized protein LOC109119443
LOC101256629 (Cab-1B)	2	40525924	40526861	40525633	40526874	1.22584	7.55725e-59	NP_001316856.1	265	chlorophyll a/b-binding protein Cab-1B
LOC104645659	2	3119260	3122189	3118663	3123768	1.17194	1.15605e-241	XP_010315835.1	625	uncharacterized protein LOC104645659
LOC101267079	2	45312597	45315301	45312577	45315336	1.13883	3.28098e-123	XP_004232673.1	711	DEAD-box ATP-dependent RNA helicase 21
LOC109119564	2	38743001	38744816	38742121	38746812	1.11727	1.63129e-206	XP_019067782.1	509	probable LRR receptor-like serine/threonine-protein kinase At3g47570
LOC101265605	2	40505428	40506413	40505209	40506450	1.10841	6.53484e-51	XP_004233099.1	265	chlorophyll a-b binding protein 1C, chloroplastic
LOC101259210	2	42687429	42688283	42687403	42688368	1.10545	1.79548e-38	XP_004232911.1	154	ethylene-responsive transcription factor 12
LOC109119628 (TRNAD-GUC)	2	48525620	48525691	48524527	48526044	1.06941	6.57057e-60	NA	NA	NA
LOC109119507	2	4384790	4385463	4384537	4385640	1.05726	9.31556e-42	NA	NA	NA
LOC104645635	2	1694385	1695359	1694227	1696848	1.0185	1.08619e-98	XP_010315800.1	324	uncharacterized protein LOC104645635
LOC101255673	3	60643280	60644692	60642997	60645342	2.91702	0	XP_004235389.1	388	ornithine decarboxylase-like
LOC101259230	3	62058688	62062197	62057497	62063154	2.66706	0	XP_019068225.1	256	nuclear transcription factor Y subunit C-2-like
LOC101261697	3	60981004	60981841	60980545	60982062	2.24582	4.86147e-164	XP_004235410.1	219	cysteine protease inhibitor 10-like
LOC101261307	3	69902891	69903901	69902797	69904038	1.59809	1.17755e-91	XP_004235579.1	190	mitochondrial import inner membrane translocase subunit TIM23-1-like
LOC109119979 (TRNAN-GUU)	3	34605981	34606052	34603363	34609296	1.50019	0	NA	NA	NA
LOC101259408	3	2772810	2774200	2772559	2774214	1.39228	4.44414e-105	XP_004234422.1	349	protein SRC2 homolog
LOC109119735	3	52660454	52662039	52659835	52662180	1.36426	7.66693e-148	XP_019068200.1	451	uncharacterized protein LOC109119735
LOC101262802	3	62075032	62075481	62073919	62075850	1.33137	1.43372e-116	XP_019068226.1	149	nuclear transcription factor Y subunit C-1-like
LOC104646573	3	66400070	66401353	66399943	66401460	1.27427	7.65165e-85	XP_019068238.1	427	extensin-1-like
LOC104646272	3	20839838	20842108	20839657	20843106	1.18168	2.93955e-180	XP_010317867.1	578	uncharacterized protein LOC104646272
LOC101264916	3	61674871	61676451	61674823	61676616	1.11854	4.33511e-84	XP_010319111.1	526	DELLA protein RGL1-like
LOC104646434	3	48732440	48734127	48730975	48736494	1.08974	2.02921e-258	XP_010318141.1	161	uncharacterized protein LOC104646434
LOC104646489	3	55979742	55980620	55973077	55981494	1.06899	0	XP_010318361.1	199	uncharacterized protein LOC104646489
LOC101245437	3	9314577	9315088	9304099	9315552	1.02824	0	XP_004234723.1	135	uncharacterized protein LOC101245437
LOC109119726	3	44231442	44233650	44231071	44234658	1.01484	3.25452e-149	XP_019068188.1	229	uncharacterized protein LOC109119726
LOC104646328	3	27557087	27557413	27556531	27557634	1.00422	1.94405e-42	XP_010317943.1	108	ctenidin-3-like
LOC109120134	4	48005408	48007396	48002197	48007578	2.38241	0	XP_019069093.1	404	uncharacterized protein LOC109120134
LOC101256765	4	5190643	5192146	5190457	5192388	2.08253	2.7562e-182	XP_019068862.1	360	zeatin O-xylosyltransferase-like
LOC101246127	4	7433311	7434054	7433095	7434750	1.53456	1.20981e-109	XP_004237095.1	247	F-box/kelch-repeat protein At3g18720-like
LOC101255875	4	7355700	7363826	7353883	7364094	1.45485	0	XP_004236570.2	539	DNA-(apurinic or apyrimidinic site) lyase, chloroplastic isoform X1
LOC101258251	4	48448103	48450061	48446833	48450696	1.39825	1.13241e-235	XP_004237641.1	368	uncharacterized protein LOC101258251
LOC101261025	4	59619916	59620749	59619865	59620830	1.30464	4.19275e-49	XP_004238512.2	202	uncharacterized protein LOC101261025
LOC104646692	4	4399162	4399592	4398613	4400130	1.29241	1.40557e-79	NA	NA	NA
LOC109120070	4	53632471	53633030	53632459	53633424	1.27559	1.29171e-47	XP_019068985.1	107	uncharacterized protein LOC109120070
LOC104646849	4	29353807	29359031	29353429	29361156	1.24838	0	XP_019068950.1	1687	uncharacterized protein LOC104646849
LOC104647079	4	45147583	45148257	45144217	45153324	1.24296	0	XP_010319953.1	224	putative uncharacterized protein DDB_G0290521
LOC104647044	4	51859996	51860763	51849913	51863712	1.22921	0	XP_010319907.1	203	uncharacterized protein LOC104647044
LOC104647045	4	51853739	51854698	51849913	51863712	1.22921	0	XP_010319908.1	319	putative uncharacterized protein DDB_G0290521
LOC109120146	4	58004523	58004726	58003885	58005264	1.21696	5.27483e-66	NA	NA	NA
LOC101256171	4	7338774	7344307	7334287	7344360	1.19345	0	XP_004236571.1	425	UDP-N-acetylglucosamine--dolichyl-phosphate N-acetylglucosaminephosphotransferase
LOC101256472	4	7334378	7338780	7334287	7344360	1.19345	0	XP_004236572.1	580	U4/U6 small nuclear ribonucleoprotein PRP4-like protein
LOC101246920	4	56067713	56068747	56065813	56069400	1.18728	1.45862e-173	XP_004237765.1	344	uncharacterized protein LOC101246920
LOC109120214 (TRNAY-GUA)	4	4062831	4062913	4061893	4063272	1.18602	1.27775e-63	NA	NA	NA
LOC109120126	4	16165553	16165972	16164907	16166010	1.18602	6.9581e-50	XP_019069070.1	140	uncharacterized protein LOC109120126, partial
LOC109120073	4	54335021	54336365	54334603	54336396	1.1291	2.29925e-78	NA	NA	NA
LOC109120185 (TRNAF-GAA)	4	41213600	41213673	41211355	41214114	1.12034	1.55824e-121	NA	NA	NA
LOC104646802	4	18643	19678	18493	20148	1.09494	8.70747e-69	XP_010319567.1	285	keratin, type I cytoskeletal 9-like
LOC104647097	4	38587606	38589906	38585767	38590182	1.08907	9.11119e-189	XP_010319975.1	733	uncharacterized protein LOC104647097
LOC109120014	4	8940108	8940590	8939779	8941296	1.08312	1.07675e-61	XP_019068928.1	160	uncharacterized protein LOC109120014
LOC101267800	4	46970355	46970917	46970233	46971198	1.07314	3.24954e-37	XP_004237654.1	135	60S ribosomal protein L12-like
LOC101265225	4	8942235	8943203	8941711	8943366	1.03614	2.67231e-63	XP_004237088.1	322	uncharacterized protein LOC101265225
DREB3 (LOC543714)	4	59868067	59868901	59867713	59868954	1.02814	5.50385e-46	NP_001234707.1	264	dehydration-responsive element binding protein 3
LOC101258147	4	1829235	1833646	1829191	1834296	1.00836	2.3704e-194	XP_004237189.1	890	putative late blight resistance protein homolog R1B-17
LOC104647080	4	44846802	44848059	44844895	44849448	1.0014	4.01911e-171	XP_010319955.1	402	uncharacterized protein LOC104647080
LOC101260641	5	2083762	2084886	2083663	2084904	2.21482	8.16467e-135	NA	NA	NA
LOC101252686	5	4773001	4780503	4772317	4780596	1.62608	0	XP_004239004.1	210	transcription initiation factor TFIID subunit 11
LOC104647488	5	19555222	19555971	19545907	19558740	1.59044	0	XP_010321217.1	230	uncharacterized protein LOC104647488
LOC109120305	5	60479215	60480375	60477535	60480570	1.5057	9.01314e-229	XP_019069511.1	386	uncharacterized protein LOC109120305
LOC101259935	5	26747814	26748383	26746747	26748540	1.48332	4.05076e-129	XP_004239564.1	189	uncharacterized protein LOC101259935
LOC104647703	5	58337074	58339163	58335499	58341570	1.44164	0	XP_010321642.1	670	uncharacterized protein LOC104647703
LOC104647507	5	27507198	27508017	27504781	27508230	1.39131	1.69569e-235	XP_010321238.1	250	uncharacterized protein LOC104647507
LOC104647471	5	10818436	10818735	10818097	10819200	1.33505	2.47587e-66	NA	NA	NA
LOC101267895	5	60605652	60608632	60605461	60609186	1.32601	7.95694e-239	XP_019069358.1	509	uncharacterized protein LOC101267895
LOC101267113	5	4112172	4113917	4112125	4113918	1.32321	5.31932e-111	XP_004238970.1	453	aspartyl protease family protein 2
LOC104647372	5	19647084	19648544	19646233	19649268	1.236	3.38443e-175	NA	NA	NA
LOC101267997	5	64165948	64168383	64165447	64170828	1.22811	0	XP_019069523.1	811	uncharacterized protein LOC101267997
LOC101267807	5	3171066	3172093	3170413	3175518	1.15925	2.85665e-272	XP_019069300.1	263	LEAF RUST 10 DISEASE-RESISTANCE LOCUS RECEPTOR-LIKE PROTEIN KINASE-like 1.1, partial
LOC101268104	5	3171876	3175350	3170413	3175518	1.15925	2.85665e-272	XP_004239409.1	631	LEAF RUST 10 DISEASE-RESISTANCE LOCUS RECEPTOR-LIKE PROTEIN KINASE-like 1.1
LOC101268473	5	10720816	10721274	10720255	10721634	1.1435	3.50643e-68	XP_010321193.1	152	uncharacterized protein LOC101268473
LOC104647687	5	60259925	60260455	60259633	60264876	1.05213	8.19335e-242	XP_010321622.1	176	uncharacterized protein LOC104647687
LOC109120307	5	60904001	60906519	60903403	60907128	1.05088	3.10784e-170	XP_019069516.1	575	uncharacterized protein LOC109120307
LOC101254899	5	4749465	4751035	4749271	4751616	1.04829	3.92867e-105	XP_010320811.1	290	LEAF RUST 10 DISEASE-RESISTANCE LOCUS RECEPTOR-LIKE PROTEIN KINASE-like 1.1
LOC109120277	5	27477227	27477794	27475939	27479250	1.04187	7.4391e-149	XP_019069480.1	169	uncharacterized protein LOC109120277
LOC101253492	5	58333601	58334071	58331911	58335498	1.0268	4.82107e-158	XP_004240289.1	156	uncharacterized protein LOC101253492
LOC101253785	5	43959673	43960182	43958383	43960314	1.02454	7.6538e-83	XP_004239621.1	169	uncharacterized protein LOC101253785
LOC101264829	6	3451314	3453019	3450553	3453726	2.31099	0	XP_010321866.1	97	pentatricopeptide repeat-containing protein At5g27110-like isoform X1
LOC104648102	6	44550877	44551956	44549851	44552058	1.46159	1.94613e-166	XP_010322969.1	359	E3 ubiquitin-protein ligase RING1-like
LOC101252404	6	47043338	47044541	47043097	47044614	1.41076	1.28731e-106	XP_004242078.1	182	protein yippee-like At3g08990
LOC101256009	6	46748398	46749663	46747363	46750950	1.2731	4.29573e-229	NA	NA	NA
LOC101267122	6	2707265	2709386	2707147	2710044	1.19515	6.08764e-168	NA	NA	NA
LOC104647995	6	36334547	36335455	36334297	36335538	1.17595	8.81553e-67	XP_010322298.1	302	glycine-rich cell wall structural protein-like
LOC101256300	6	46743277	46744375	46742671	46745982	1.17483	4.2663e-188	NA	NA	NA
LOC101266339	6	24789543	24791895	24785905	24797358	1.14541	0	XP_004240794.1	572	uncharacterized protein LOC101266339
LOC104647895	6	24791923	24794269	24785905	24797358	1.14541	0	XP_010322042.1	633	uncharacterized protein LOC104647895
LOC101245766	6	13462281	13462793	13462039	13463832	1.11103	2.4071e-91	XP_004240689.1	170	uncharacterized protein LOC101245766
LOC101253293	6	32085342	32086286	32084725	32088450	1.06467	1.8697e-183	XP_004241095.1	314	uncharacterized protein LOC101253293
LOC101266520	6	2161339	2164840	2161081	2165220	1.06456	2.36643e-204	XP_010321824.1	992	LOW QUALITY PROTEIN: probable leucine-rich repeat receptor-like protein kinase At1g35710
LOC104648330	7	27472939	27473856	27470281	27474144	1.72088	0	XP_010323554.1	305	uncharacterized protein LOC104648330
LOC101246070	7	59520787	59522263	59520505	59522298	1.66647	1.526e-140	XP_004243525.1	331	peroxidase 3-like
LOC101260449	7	51751242	51753167	51751105	51753450	1.39154	6.92576e-149	XP_010324025.1	641	pollen-specific leucine-rich repeat extensin-like protein 1
LOC109120675	7	5690294	5691385	5689327	5691810	1.33546	1.44355e-149	XP_019070229.1	363	uncharacterized protein LOC109120675
LOC101258276	7	30497015	30498963	30496897	30499242	1.27246	7.81531e-132	NA	NA	NA
LOC101244784	7	13319136	13320380	13318795	13320726	1.21653	6.42941e-101	XP_004243098.1	414	uncharacterized protein LOC101244784
LOC109120695	7	37902184	37903434	37899355	37904460	1.1298	1.14236e-247	XP_019070254.1	272	uncharacterized protein LOC109120695
LOC109120717	7	57021924	57024254	57021463	57026706	1.07558	2.02154e-236	XP_019070277.1	574	uncharacterized protein LOC109120717
LOC109120666	7	110963	112153	110815	113298	1.07196	3.60798e-109	XP_019070215.1	381	collagen alpha-2(I) chain-like
LOC104648331	7	29988852	29989688	29988643	29989884	1.05904	1.97949e-51	XP_010323555.1	182	uncharacterized protein LOC104648331
LOC109121027 (TRNAR-ACG)	8	46955195	46955268	46954915	46955880	3.18274	2.21924e-123	NA	NA	NA
LOC101262438	8	9439206	9440533	9415465	9442098	2.19036	0	XP_004244849.1	151	uncharacterized protein LOC101262438
LOC101257987	8	10447102	10447764	10445221	10448670	2.09348	0	XP_004244934.1	220	uncharacterized protein LOC101257987
LOC104648914	8	54810662	54815780	54804769	54816912	1.87837	0	XP_019070709.1	1591	LOW QUALITY PROTEIN: uncharacterized protein LOC104648914
LOC109120863	8	11143707	11144150	11143225	11144328	1.87295	6.29251e-93	XP_019070660.1	147	uncharacterized protein LOC109120863
LOC104648715	8	39237870	39239420	39236161	39239886	1.4232	7.56554e-244	XP_010324839.1	253	uncharacterized protein LOC104648715
LOC104648740	8	22372876	22373690	22372285	22373940	1.41953	5.54772e-104	NA	NA	NA
LOC101254817	8	52077583	52078617	52076647	52079958	1.39099	1.74521e-209	XP_004245358.1	344	uncharacterized protein LOC101254817
LOC104648761	8	25174215	25175073	25173685	25175340	1.34003	2.66282e-96	XP_010324927.1	252	uncharacterized protein LOC104648761
LOC101262643	8	63977697	63978897	63977491	63979560	1.25017	7.24905e-111	XP_004245620.2	212	protein LURP-one-related 11-like
LOC104648675	8	9213761	9216139	9210259	9217572	1.14436	0	XP_010324775.1	627	uncharacterized protein LOC104648675
LOC104648880	8	46639615	46640751	46636411	46641930	1.14409	2.55107e-268	XP_010325217.1	326	uncharacterized protein LOC104648880
LOC101249288	8	59728918	59729899	59728885	59729988	1.1345	3.93148e-49	NA	NA	NA
LOC109120888	8	43998495	43999166	43997989	44000196	1.13188	8.10238e-103	XP_019070683.1	223	uncharacterized protein LOC109120888
LOC109120884	8	39854230	39854700	39851365	39857160	1.11921	6.9129e-273	XP_019070679.1	156	uncharacterized protein LOC109120884
LOC109120886	8	43949396	43952841	43949275	43953276	1.09254	2.14859e-180	XP_019070681.1	964	uncharacterized protein LOC109120886
LOC101254115	8	24332952	24333821	24329125	24335748	1.06649	1.60543e-290	XP_004244984.1	213	uncharacterized protein LOC101254115
LOC109120875	8	23994920	23996080	23994751	23997372	1.0654	2.35768e-112	XP_019070670.1	386	uncharacterized protein LOC109120875
LOC101267546	8	16635415	16636250	16635211	16636314	1.02279	3.52896e-42	NA	NA	NA
LOC101245864	8	39457313	39458048	39456547	39458064	1.01266	1.3364e-58	XP_004244908.1	168	uncharacterized protein LOC101245864
LOC101252809	9	9222622	9227269	9221989	9227508	2.15239	0	NA	NA	NA
LOC104649395	9	69575417	69576052	69575323	69576288	2.11066	6.38987e-91	XP_019071131.1	211	acanthoscurrin-2-like
LOC101256913	9	3686948	3688045	3686671	3688602	2.02403	8.91296e-187	XP_004246877.1	365	uncharacterized protein LOC101256913
LOC104649434	9	71702839	71703576	71697625	71704800	1.90381	0	XP_010326900.1	245	putative uncharacterized protein DDB_G0290521
LOC104649177	9	20748394	20750763	20740297	20754372	1.81082	0	XP_010326221.1	554	uncharacterized protein LOC104649177
LOC101264157	9	71991896	71996647	71991565	71996808	1.68467	0	XP_019071145.1	1237	putative late blight resistance protein homolog R1A-3
LOC104649421	9	69924515	69926488	69924325	69926532	1.67746	3.84162e-175	XP_019071134.1	605	glycine-rich cell wall structural protein
LOC101259188	9	18915123	18915818	18909727	18925044	1.64403	0	XP_004246784.1	231	uncharacterized protein LOC101259188
LOC104649124	9	6794396	6794956	6793741	6798708	1.60224	0	XP_010326129.1	186	putative uncharacterized protein DDB_G0290521
LOC101258895	9	54556179	54557035	54553885	54557610	1.59201	1.57373e-283	XP_004247282.1	264	uncharacterized protein LOC101258895
LOC104649181	9	21178864	21182423	21174445	21182724	1.55601	0	XP_019071093.1	1149	LOW QUALITY PROTEIN: uncharacterized protein LOC104649181
LOC109121200 (TRNAE-UUC)	9	24624406	24624477	24623479	24624582	1.52456	9.21375e-74	NA	NA	NA
LOC104649296	9	54704425	54705957	54702373	54709548	1.49648	0	XP_019071105.1	465	uncharacterized protein LOC104649296
LOC101266153	9	33486073	33490044	33483907	33495498	1.432	0	XP_004247003.1	1020	uncharacterized protein LOC101266153
LOC109121085	9	56915714	56916536	56913133	56917824	1.42004	0	XP_019071107.1	218	uncharacterized protein LOC109121085
LOC104649292	9	53304198	53305259	53302501	53306502	1.37305	4.92195e-252	XP_010326482.1	353	DNA damage-inducible protein 1-like
LOC101250252	9	71589068	71589940	71588881	71590950	1.37258	5.50159e-127	XP_019071139.1	290	F-box protein At3g07870-like
LOC109118725	9	353791	356206	352591	356454	1.34782	4.60254e-237	NA	NA	NA
LOC109121128	9	68759711	68761367	68759605	68761536	1.27968	2.80001e-107	NA	NA	NA
LOC109121048	9	46686935	46688162	46686643	46688988	1.23832	1.22018e-125	XP_019071051.1	213	uncharacterized protein LOC109121048
LOC101245091	9	5437039	5439982	5436235	5443410	1.20272	0	XP_010326141.1	306	uncharacterized protein LOC101245091
LOC104649325	9	60628177	60629974	60626437	60632646	1.19159	0	XP_010326520.1	416	uncharacterized protein LOC104649325
LOC104649202	9	40960582	40961460	40957021	40965714	1.16637	0	NA	NA	NA
LOC101263639	9	56845151	56847936	56843167	56849100	1.08566	7.17533e-269	NA	NA	NA
LOC104649274	9	39704322	39704729	39694873	39707016	1.08114	0	XP_010326458.1	135	uncharacterized protein LOC104649274
LOC104644419	10	59457262	59459391	59455645	59466408	1.93272	0	XP_010312387.1	550	uncharacterized protein LOC104644419
LOC104649582	10	11687248	11690289	11685427	11692602	1.92306	0	XP_010327350.1	902	uncharacterized protein LOC104649582
LOC101243650	10	42820371	42821963	42819055	42822228	1.79492	2.33459e-274	XP_010327613.1	479	uncharacterized protein LOC101243650
LOC101264682	10	56992190	56992756	56991241	56996760	1.6662	0	XP_004248853.1	162	uncharacterized protein LOC101264682
LOC104649734	10	51886255	51886797	51883861	51887724	1.62699	9.72681e-300	XP_010327572.1	180	uncharacterized protein LOC104649734
LOC109121277	10	43943362	43946499	43942513	43947480	1.35083	4.59217e-305	XP_019071491.1	858	uncharacterized protein LOC109121277
LOC101244428	10	56284968	56289591	56283853	56289786	1.33439	0	NA	NA	NA
LOC109121302	10	58918041	58920956	58917721	58926276	1.3071	0	NA	NA	NA
LOC104649767	10	42790096	42790737	42789937	42792144	1.21729	3.8133e-114	XP_010327614.1	213	uncharacterized protein LOC104649767
LOC101257317	10	46098500	46099266	46096555	46103178	1.20243	0	XP_010327599.1	140	mediator of RNA polymerase II transcription subunit 20a-like
LOC101266468	10	33640784	33643537	33640261	33643986	1.18098	5.90204e-188	XP_019071473.1	887	uncharacterized protein LOC101266468
LOC101256228	10	55745731	55746142	55745653	55748826	1.16949	4.22305e-157	NA	NA	NA
LOC101251136	10	57908720	57910074	57908665	57910182	1.15598	2.9179e-71	XP_004249000.1	322	endochitinase
LOC109121295	10	56457875	56458477	56457043	56460630	1.14258	2.98678e-172	XP_019071513.1	200	uncharacterized protein LOC109121295
LOC104649766	10	42823002	42824940	42822781	42825402	1.10058	7.39308e-118	XP_019071486.1	397	uncharacterized protein LOC104649766
LOC109118710	10	3867540	3868373	3867451	3868554	1.08775	3.624e-46	XP_019071442.1	261	jasmonic acid-amido synthetase JAR1-like
LOC109121222	10	6136819	6138446	6136723	6138516	1.06363	2.81473e-75	NA	NA	NA
LOC109119018 (TRNAN-GUU)	11	45251028	45251099	45249925	45251304	2.77124	1.94857e-180	NA	NA	NA
LOC101264696	11	45343808	45345658	45343627	45345834	2.13133	1.14369e-240	XP_019066401.1	392	uncharacterized protein LOC101264696
LOC104644604	11	18655606	18662793	18655393	18663810	1.95756	0	NA	NA	NA
LOC101260395	11	13373000	13374965	13371649	13380480	1.92908	0	NA	NA	NA
LOC109119015 (TRNAN-GUU)	11	13380228	13380299	13371649	13380480	1.92908	0	NA	NA	NA
LOC104644612	11	20531512	20532027	20529985	20536056	1.84344	0	XP_010312994.1	171	uncharacterized protein LOC104644612
LOC104644731	11	45440092	45441103	45439951	45441606	1.78785	1.43052e-147	XP_010313184.1	218	uncharacterized protein LOC104644731
LOC104644733	11	45337659	45338769	45336451	45338934	1.78239	3.69633e-226	NA	NA	NA
LOC109118857	11	19682877	19683383	19682251	19683492	1.72835	1.4508e-116	XP_019066465.1	168	uncharacterized protein LOC109118857, partial
LOC101262684	11	45374379	45377098	45373987	45377988	1.55723	0	XP_004250855.2	224	uncharacterized protein LOC101262684
LOC104644568	11	9657007	9657420	9656551	9658620	1.47075	4.82451e-148	XP_010312936.1	137	uncharacterized protein LOC104644568
LOC109118967	11	31586354	31587637	31585855	31588062	1.37484	4.64076e-145	XP_019066557.1	121	LOW QUALITY PROTEIN: uncharacterized protein LOC109118967
LOC101258816	11	18741860	18743200	18740539	18743298	1.36439	2.50143e-181	XP_010312988.1	395	uncharacterized protein LOC101258816
LOC101262988	11	53239684	53240503	53239573	53240538	1.28183	7.15698e-54	XP_004251067.1	188	uncharacterized protein LOC101262988
LOC101259116	11	16952187	16952570	16951645	16952610	1.15821	9.00748e-47	XP_004250850.1	127	uncharacterized protein LOC101259116
LOC101268646	11	48190787	48192973	48190567	48194430	1.15554	3.63918e-203	XP_010313564.1	728	uncharacterized protein LOC101268646
LOC104644791	11	48193141	48194277	48190567	48194430	1.15554	3.63918e-203	XP_010313565.1	378	uncharacterized protein LOC104644791
LOC104644539	11	3650780	3651838	3650653	3651894	1.14703	6.59749e-61	XP_010312898.1	352	uncharacterized protein LOC104644539
LOC104644618	11	21633015	21634014	21629845	21636192	1.10074	0	XP_010312999.1	172	uncharacterized protein LOC104644618
LOC109118973	11	23085340	23085821	23084641	23087124	1.07454	1.51706e-115	NA	NA	NA
LOC101253445	11	2174725	2175363	2174467	2175432	1.02959	2.09538e-39	XP_010312894.1	212	glycine-rich cell wall structural protein 2-like
LOC101268351	11	48188205	48189020	48186427	48189462	1.024	3.23171e-132	XP_004251325.1	271	uncharacterized protein LOC101268351
LOC104644712	11	29735899	29737033	29733205	29738586	1.02013	3.36527e-236	XP_010313167.1	207	uncharacterized protein LOC104644712
LOC101263373	11	14249579	14250520	14247259	14250846	1.01461	8.35186e-155	XP_004250624.1	313	uncharacterized protein LOC101263373
LOC101244064	12	36351051	36351771	36350719	36351822	1.97941	6.64645e-97	XP_010314536.2	216	uncharacterized protein LOC101244064
LOC104644930	12	9011775	9013415	9011401	9014850	1.88016	0	XP_010314107.1	546	uncharacterized protein LOC104644930
LOC109119084	12	38671120	38671878	38670913	38672016	1.55171	1.07511e-73	XP_019066945.1	252	uncharacterized protein LOC109119084
LOC104644867	12	6877933	6880254	6877921	6880680	1.23583	3.69256e-145	NA	NA	NA
LOC109119070	12	20353299	20353790	20352793	20357346	1.23111	9.68081e-242	XP_019066928.1	163	uncharacterized protein LOC109119070
LOC101247704	12	39860765	39862056	39859783	39862266	1.19421	6.92307e-124	XP_019067013.1	237	uncharacterized protein LOC101247704
LOC109119062	12	5673687	5674289	5673457	5674560	1.18662	1.20148e-51	XP_019066911.1	200	uncharacterized protein LOC109119062
LOC109119090	12	42780898	42781956	42779173	42782622	1.15273	2.43845e-165	XP_019066954.1	353	uncharacterized protein LOC109119090, partial
LOC109119096	12	47213528	47214292	47213389	47216976	1.14235	7.23288e-170	XP_019066960.1	254	uncharacterized protein LOC109119096
LOC109119097	12	47214427	47216460	47213389	47216976	1.14235	7.23288e-170	XP_019066961.1	677	uncharacterized protein LOC109119097
LOC104645226	12	65605425	65606579	65604373	65606856	1.13814	1.58612e-115	XP_010314858.1	384	uncharacterized protein LOC104645226
LOC104645040	12	59285869	59286486	59285629	59286594	1.12979	1.60163e-41	XP_010314351.1	205	uncharacterized protein LOC104645040
LOC104644931	12	9898530	9899886	9898327	9902052	1.12954	1.15885e-173	XP_010314108.1	409	uncharacterized protein LOC104644931
LOC101267971	12	2626154	2627311	2625589	2627382	1.11313	1.75111e-79	NA	NA	NA
LOC104645084	12	46878398	46879120	46878049	46879290	1.08664	9.57836e-52	XP_010314407.1	240	uncharacterized protein LOC104645084
LOC109119103	12	56131140	56132833	56128603	56134536	1.05489	6.95558e-252	XP_019066969.1	444	uncharacterized protein LOC109119103
LOC104645102	12	42253923	42256094	42252703	42256428	1.00388	3.08651e-145	XP_010314424.1	723	uncharacterized protein LOC104645102

## Sheet: README
List of genes in regions with statistically significantly high and low CNVs in S. pimpinellifolium using S. lycopersicum genes as a reference (this information is complementary to Table S16).
Method: CNVs were investigated using CNV-seq v0.2.7. Genomic raw reads from S. pimpinellifolium and S. lycopersicum (SRR404081) were aligned to the S. lycopersicum reference genome (NCBI assembly accession GCF_000188115.3) using BWA v0.7.10 and alignment files were post-processed using SAMtools v1.3.1 . Following this, short read data from S. pimpinellifolium and S. lycopersicum were mapped to th…
